# Supplementary material for: A nanocomposite of tin dioxide octahedral nanocrystals exposed to high-energy facets anchored onto graphene sheets for high performance lithium-ion batteries
Source: Royal Society of Chemistry journal article supplement (doi:10.1039/c4ta01850h), 2014-07-01
Supplement: c4ta01850h1.pdf [file c4ta01850h1.pdf]

## Supporting information

### **A nanocomposite of tin dioxide octahedral nanocrystals exposed with high-energy facets anchored on graphene sheets for high performance lithium-ion batteries**

Daoping Cai,<sup>a</sup> Ting Yang,<sup>b</sup> Bin Liu,<sup>a</sup> Dandan Wang,<sup>a</sup> Yuan Liu,<sup>a</sup> Lingling Wang,<sup>a</sup> Qihong Li<sup>a</sup> and Taihong Wang<sup>a,b\*</sup>

<sup>a</sup> Pen-Tung Sah Institute of Micro-Nano Science and Technology, Xiamen University, Xiamen 361000, China.

<sup>b</sup> Key Laboratory for Micro-Nano Optoelectronic Devices of Ministry of Education and State Key Laboratory for Chemo/Biosensing and Chemometrics, Hunan University, Changsha, 410082, China.

\*E-mail of the corresponding author: thwang@xmu.edu.cn

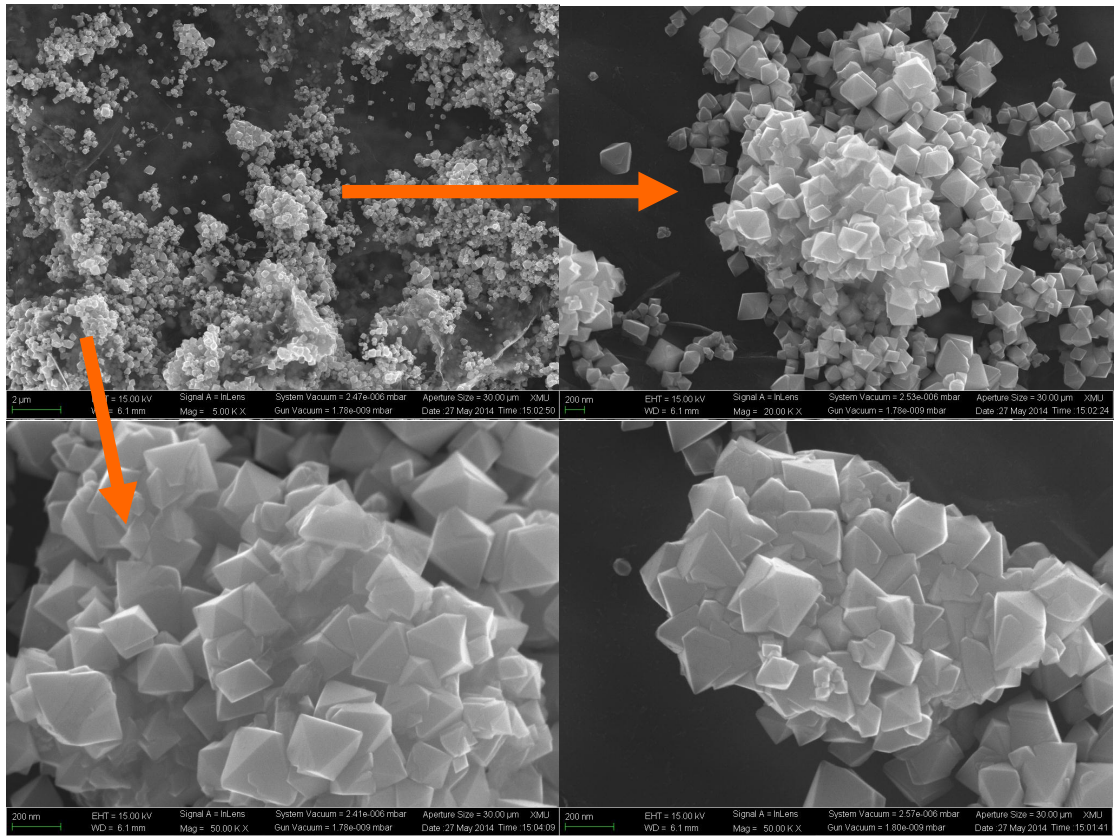

Figure S1. SEM images of the SnO<sub>2</sub>/GS nanocomposite without the addition of PVP when the amount of HCl is 0.4 mL

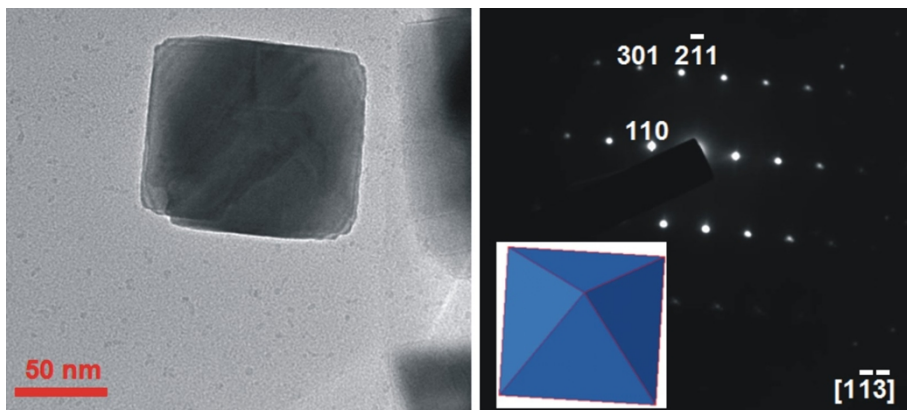

Figure S2. TEM image of a SnO<sub>2</sub> ONC viewed along the [1-1-3] direction and the corresponding SAED pattern (inset the SnO<sub>2</sub> ONC enclosed by {332} facets projected along the same direction).
